# Supplementary material
Source: PubMed Central journal article supplement (PMC7042037)
Supplement: NIHMS1545785-supplement-1.pdf [file NIHMS1545785-supplement-1.pdf]

### Supplemental Tables

Table S1. Characteristics of patients with isolated class III obesity who delivered before and after implementation of a policy for delivery at 39 weeks gestation.

|                                                      | Pre-Policy Change<br>(n=307) | Post-Policy Change<br>(n=312) | p      |
|------------------------------------------------------|------------------------------|-------------------------------|--------|
| Maternal Age (mean±sd, years)                        | 26.8 ± 5.5                   | 27.7 ± 5.3                    | 0.045  |
| Gestational Age (mean±sd, days)                      | 278.6 ± 7.4                  | 276.5 ± 6.7                   | 0.0001 |
| Body Mass Index (median(IQR),<br>kg/m <sup>2</sup> ) | 44.1 (5.0)                   | 43.2 (4.7)                    | 0.05   |
| Race/Ethnicity                                       |                              |                               | 0.42   |
| White                                                | 147 (47.9)                   | 166 (53.2)                    |        |
| African American                                     | 68 (22.2)                    | 57 (18.3)                     |        |
| Hispanic                                             | 80 (26.1)                    | 72 (23.1)                     |        |
| American Indian                                      | 8 (2.6)                      | 9 (2.9)                       |        |
| Other                                                | 4 (1.3)                      | 8 (2.6)                       |        |
| Payor Status                                         |                              |                               | 0.06   |
| Commercial                                           | 81 (26.4)                    | 104 (33.3)                    |        |
| Government/Self                                      | 226 (73.6)                   | 208 (66.7)                    |        |
| Nulliparous                                          | 84 (27.4)                    | 72 (23.1)                     | 0.22   |
| Prior Cesarean                                       | 63 (20.5)                    | 98 (31.4)                     | 0.002  |

Abbreviations used: sd=standard deviation, kg=kilogram, m=meter, IQR=interquartile range.

Body mass index at the time of delivery is reported.

Data are reported as mean ± standard deviation, median (IQR), or n (%) and analyzed using Student's t test, Wilcoxon rank sum, or chi-square test, as appropriate.

Table S2. Risk ratios and 95% confidence intervals for associations between policy implementation and cesarean delivery among 619 patients with isolated class III obesity.

| Cesarean Deliveries                           |                                |                                 |                           |                                  |
|-----------------------------------------------|--------------------------------|---------------------------------|---------------------------|----------------------------------|
| All patients                                  | Pre-policy<br>(n=307)<br>n (%) | Post-policy<br>(n=312)<br>n (%) | Unadjusted<br>RR (95% CI) | Adjusted RR<br>(95% CI)          |
| All deliveries (n=619)                        | 104 (33.9)                     | 131 (42.0)                      | 1.24<br>(1.01-1.52)       | 1.05<br>(0.89-1.24) <sup>a</sup> |
| Parous (n=463)                                | 70 (31.4)                      | 97 (40.4)                       | 1.29<br>(1.01-1.65)       | 1.02<br>(0.85-1.23) <sup>b</sup> |
| Nulliparous (N=156)                           | 34 (40.5)                      | 34 (47.2)                       | 1.17<br>(0.82-1.67)       | 1.00<br>(0.70-1.43) <sup>c</sup> |
| Patients attempting vaginal<br>delivery       | Pre-policy<br>(n=253)          | Post-policy<br>(n=226)          | Unadjusted<br>RR (95% CI) | Adjusted RR<br>(95% CI)          |
| All vaginal delivery<br>attempts (n=479)      | 50 (19.8)                      | 45 (19.9)                       | 1.01<br>(0.70-1.44)       | 0.87<br>(0.63-1.21) <sup>d</sup> |
| Parous with induction of<br>labor (n=148)     | 13 (19.7)                      | 11 (13.4)                       | 0.68<br>(0.33-1.42)       | – <sup>e</sup>                   |
| Parous with spontaneous<br>labor (n=186)      | 10 (9.1)                       | 4 (5.3)                         | 0.68<br>(0.19-1.78)       | – <sup>e</sup>                   |
| Nulliparous with<br>induction of labor (n=81) | 18 (47.4)                      | 26 (60.5)                       | 1.28<br>(0.84-1.93)       | – <sup>e</sup>                   |
| Nulliparous with<br>spontaneous labor (n=64)  | 9 (23.1)                       | 4 (16.0)                        | 0.69<br>(0.24-2.01)       | – <sup>e</sup>                   |

Abbreviations used: RR = risk ratio.

Data are reported as proportion of n or RR (95% confidence interval).

a Adjusted model controlled for maternal age, race, parity, body mass index, prior cesarean section, cervical ripening, labor induction, and payor

b Adjusted model controlled for maternal age, race, body mass index, prior cesarean section, cervical ripening, labor induction, and payor

c Adjusted model controlled for maternal age, race, body mass index, cervical ripening, labor induction, and payor

d Adjusted model controlled for maternal age, race, parity, body mass index, prior cesarean, and payor

e Number of events in this subgroup was too sparse to support multivariable model controlling for all covariates of interest

Table S3. Maternal and neonatal outcomes of all patients with isolated class III obesity who delivered before or after implementation of a policy for delivery at 39 weeks.

|                                                                  | Pre-Policy<br>(n=307) | Post-Policy<br>(n=312) | Unadjusted RR<br>(95% CI) |
|------------------------------------------------------------------|-----------------------|------------------------|---------------------------|
| Chorioamnionitis                                                 | 3.6                   | 3.5                    | 0.98 (0.43-2.24)          |
| Endometritis                                                     | 1.0                   | 1.6                    | 0.64 (0.40-6.80)          |
| Wound Infection                                                  | 5.9                   | 2.6                    | 0.44 (0.19-0.99)          |
| ICU Admission                                                    | 0.7                   | 0.0                    | -                         |
| 3 <sup>rd</sup> or 4 <sup>th</sup> Degree<br>Perineal Laceration | 1.0                   | 0.6                    | 0.66 (0.11-3.90)          |
| Venous<br>Thromboembolism                                        | 0.0                   | 0.0                    | -                         |
| Postpartum<br>Hemorrhage                                         | 3.6                   | 5.1                    | 1.43 (0.68-3.03)          |
| Blood Transfusion                                                | 1.3                   | 3.2                    | 2.46 (0.78-7.76)          |
| Composite Neonatal<br>Morbidity and Mortality                    | 8.1                   | 7.4                    | 0.91 (0.53-1.56)          |

Abbreviations used: RR = risk ratio.

Data are reported as proportion of n or risk ratio (95% confidence interval).

Some risk ratios are not calculable due to sparse data.

Table S4. Maternal and neonatal outcomes of patients with isolated class III obesity attempting vaginal delivery who delivered before or after implementation of a policy for delivery at 39 weeks.

|                                                                  | Pre-Policy<br>(n=253) | Post-Policy<br>(n=226) | Unadjusted RR<br>(95% CI) |
|------------------------------------------------------------------|-----------------------|------------------------|---------------------------|
| Chorioamnionitis                                                 | 4.4                   | 4.9                    | 1.12 (0.49-2.53)          |
| Endometritis                                                     | 1.2                   | 1.3                    | 1.12 (0.23-5.49)          |
| Wound Infection                                                  | 3.6                   | 3.1                    | 0.87 (0.33-2.30)          |
| ICU Admission                                                    | 0.8                   | 0.0                    | -                         |
| 3 <sup>rd</sup> or 4 <sup>th</sup> Degree<br>Perineal Laceration | 1.2                   | 0.9                    | 0.75 (0.13-4.43)          |
| Venous<br>Thromboembolism                                        | 0.0                   | 0.0                    | -                         |
| Postpartum<br>Hemorrhage                                         | 3.6                   | 5.8                    | 1.62 (0.70-3.71)          |
| Blood Transfusion                                                | 1.6                   | 2.7                    | 1.68 (0.48-5.87)          |
| Composite Neonatal<br>Morbidity and Mortality                    | 7.9                   | 6.6                    | 0.84 (0.44-1.60)          |

Data are reported as proportion of n or risk ratio (95% confidence interval).  
Some risk ratios are not calculable due to sparse data.
